# Supplementary material for: Antagonistic Activity of Streptomyces alfalfae 11F against Fusarium Wilt of Watermelon and Transcriptome Analysis Provides Insights into the Synthesis of Phenazine-1-Carboxamide
Source: MDPI journal article supplement (doi:10.3390/plants12223796), 2023-11-08
Supplement: s1 [file s1]

## Supplementary material

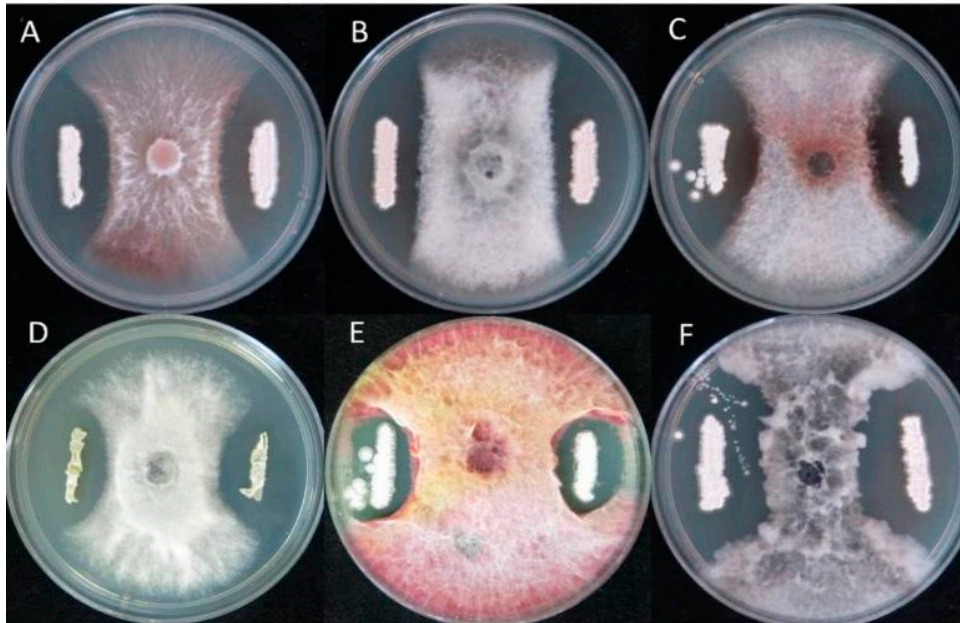

**Figure S1.** Antifungal activity of strain 11F against six pathogens. (A) *F. oxysporum* f. sp. *niveum*. (B) *S. turcica*. (C) *F. solani*. (D) *B. cinerea*. (E) *F. graminearum*. (F) *B. dothidea*.

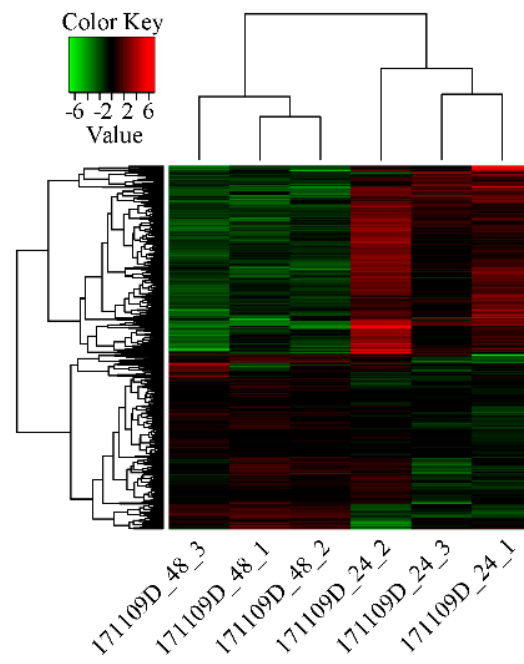

**Figure S2.** Expression patterns of the DEGs between Case 1 and Case 2.

A

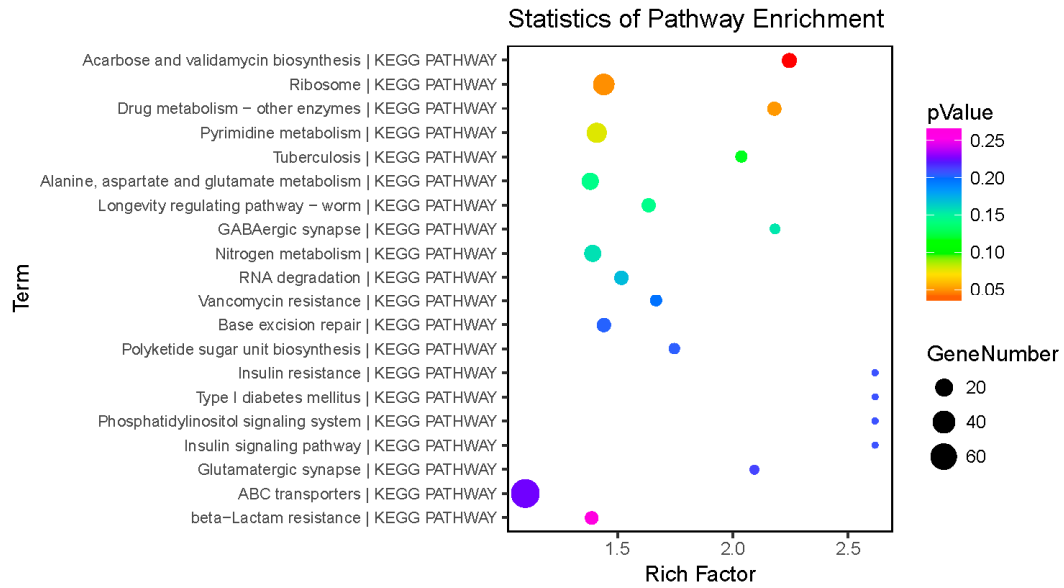

B

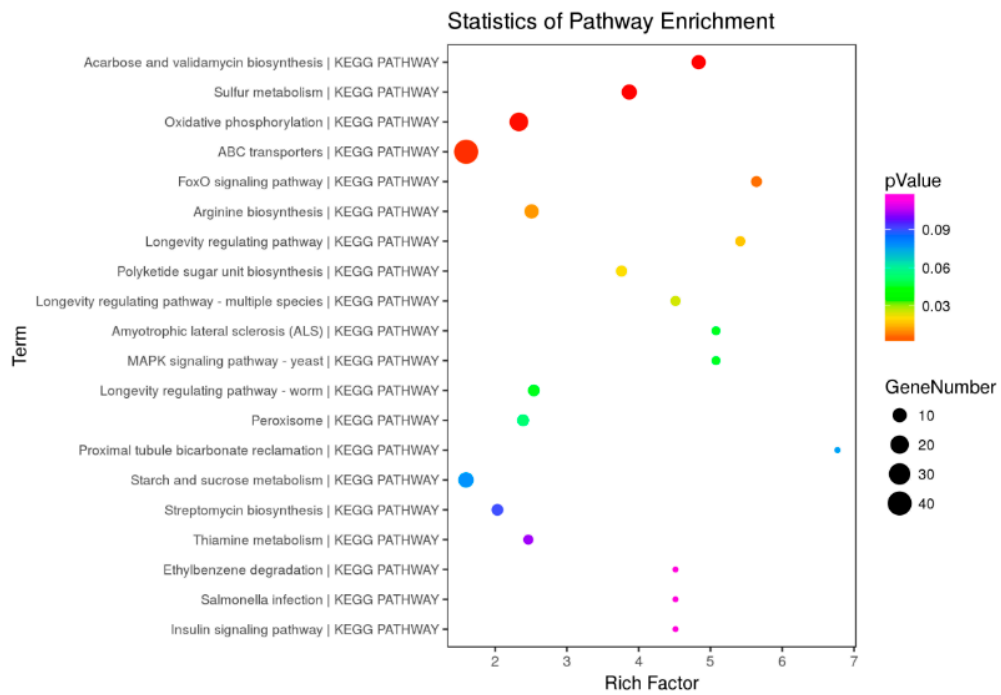

**Figure S3.** Top 20 enriched KEGG pathways. **(A)** Control vs Case 2 comparison. **(B)** Case 1 vs Case 2 comparison. The Rich Factor refers to the ratio of the number of differentially expressed transcripts in the pathway entry to the total number of transcripts in the pathway entry. Increases in the Rich Factor reflect increases in the degree of enrichment. The dot size indicates the number of DEGs assigned that particular term, whereas the dot color indicates the *p*-value.



**Table S1.** Strain 11F inhibitory effects on various fungi

| Pathogen                                 | Inhibition diameter | Inhibition rate (%) |
|------------------------------------------|---------------------|---------------------|
| <i>F. oxysporum</i> f. sp. <i>niveum</i> | 30 ± 2.31           | 64.70               |
| <i>S. turcica</i>                        | 39 ± 2.00           | 54.17               |
| <i>F. solani</i>                         | 48 ± 3.61           | 43.52               |
| <i>B. cinerea</i>                        | 50 ± 3.05           | 41.17               |
| <i>F. graminearum</i>                    | 40 ± 2.08           | 52.94               |
| <i>B. dothidea</i>                       | 31 ± 2.00           | 63.52               |

**Table S2.** Details regarding the RNA-seq data

| Sample       | Raw reads number | Raw bases  | Clean reads number | Clean rate(%) | GC(%) | Q20(%) | Q30(%) |
|--------------|------------------|------------|--------------------|---------------|-------|--------|--------|
| 171109D_24_1 | 15884350         | 2356344297 | 15337414           | 96.56         | 58    | 98.5   | 95.4   |
| 171109D_24_2 | 14898594         | 2222789172 | 14205810           | 95.35         | 68    | 98.05  | 94.17  |
| 171109D_24_3 | 15369888         | 2284379201 | 14851614           | 96.63         | 61    | 98.46  | 95.25  |
| 171109D_48_1 | 15651094         | 2313738464 | 15045242           | 96.13         | 58    | 98.47  | 95.35  |
| 171109D_48_2 | 13565412         | 2004702463 | 13069544           | 96.34         | 59    | 98.46  | 95.28  |
| 171109D_48_3 | 16731524         | 2480653375 | 16154234           | 96.55         | 61    | 98.44  | 95.2   |
| 171109D_6_1  | 16491404         | 2458547908 | 15834006           | 96.01         | 64    | 98.21  | 94.57  |
| 171109H_6_2  | 13839518         | 2066130098 | 13164796           | 95.12         | 64    | 98.09  | 94.29  |
| 171109H_6_3  | 16502726         | 2453384678 | 15838784           | 95.98         | 62    | 98.28  | 94.78  |

Raw read number: the number of raw data sequences (reads); Raw bases: the total number of bases in the raw data; Clean read number: the number of filtered data sequences (reads); Clean bases: the total number of bases after filtering; Clean rate (%): the total number of reads after filtering as a percentage of the total number of reads in the original data; Q20 (%): the number of bases with a quality value greater than 20 as a percentage of the total number of clean bases; Q30 (%): the number of bases with a quality value greater than 30 as a percentage of the total number of clean bases.

**Table S3. Mapping of the clean reads to the reference genome**

| Samples      | Total reads       | Mapped reads     | Uniquely mapped reads | Multiple mapped reads |
|--------------|-------------------|------------------|-----------------------|-----------------------|
| 171109D_24_1 | 15337414(100.00%) | 13636312(88.91%) | 12495511(91.63%)      | 1140801(8.37%)        |
| 171109D_24_2 | 14205810(100.00%) | 13938198(98.12%) | 13589269(97.50%)      | 348929(2.50%)         |
| 171109D_24_3 | 14851614(100.00%) | 14245527(95.92%) | 13947432(97.91%)      | 298095(2.09%)         |
| 171109D_48_1 | 15045242(100.00%) | 12077527(80.27%) | 9572866(79.26%)       | 2504661(20.74%)       |
| 171109D_48_2 | 13069544(100.00%) | 12589489(96.33%) | 11980742(95.16%)      | 608747(4.84%)         |
| 171109D_48_3 | 16154234(100.00%) | 15533734(96.16%) | 14941632(96.19%)      | 592102(3.81%)         |
| 171109D_6_1  | 15834006(100.00%) | 15346023(96.92%) | 15052779(98.09%)      | 293244(1.91%)         |
| 171109H_6_2  | 13164796(100.00%) | 12897613(97.97%) | 10922347(84.69%)      | 1975266(15.31%)       |
| 171109H_6_3  | 15838784(100.00%) | 15369356(97.04%) | 12031528(78.28%)      | 3337828(21.72%)       |

Total reads: the number of filtered data sequences; Mapped reads: the number of reads mapped to the reference genome sequence (the proportion of such reads as a percentage of the total number of reads); Uniquely mapped reads: the number of reads mapped to a unique location of the reference genome sequence (the proportion of such reads as a percentage of the number of mapped reads); Multiple mapped reads: the number of reads mapped to multiple locations in the reference genome sequence (the proportion of such reads as a percentage of the number of mapped reads).

**Table S4.** Detailed information for the selected genes for qPCR

| ID            | Description                                              |
|---------------|----------------------------------------------------------|
| A7J05_RS03465 | XRE family transcriptional regulator                     |
| A7J05_19090   | phosphate ABC transporter substrate-binding protein PstS |
| A7J05_03770   | phosphate ABC transporter substrate-binding protein PstS |
| A7J05_10310   | DegT/DnrJ/EryC1/StrS aminotransferase                    |
| A7J05_31935   | GNAT family N-acetyltransferase                          |
| A7J05_19075   | phosphate ABC transporter ATP-binding protein            |
| A7J05_03610   | N-acetylmuramoyl-L-alanine amidase                       |
| A7J05_03600   | aminoglycoside phosphotransferase family protein         |
| A7J05_19080   | phosphate ABC transporter permease PtsA                  |
| A7J05_08410   | AraC family transcriptional regulator                    |
| A7J05_03975   | ergothioneine biosynthesis protein EgtC                  |
| A7J05_09920   | amino acid acetyltransferase                             |
| A7J05_11495   | ABC transporter ATP-binding protein                      |
| A7J05_29000   | FadR family transcriptional regulator                    |
| A7J05_09325   | polysaccharide biosynthesis protein                      |
| A7J05_31855   | TerD family protein                                      |
| A7J05_11670   | MFS transporter                                          |
| A7J05_15660   | ABC transporter substrate-binding protein                |
| A7J05_35185   | ABC transporter permease                                 |
| A7J05_11930   | ABC transporter ATP-binding protein                      |



**Table S5.** Prediction of secondary metabolites in strain 11F using antiSMASH database

| Cluster type                          | Start gene | End gene | Most similar known cluster    | (%) Similarity |
|---------------------------------------|------------|----------|-------------------------------|----------------|
| butyrolactone-like-pks-nrps           | 51512      | 33151389 | Microtermolide A              | 46             |
| terpene                               | 177378     | 199295   | Lavendiol                     | 6              |
| t1pks-nucleoside-nrps                 | 316214     | 485864   | Nystatin                      | 36             |
| transatpks-nrps                       | 597379     | 695568   | Oxazolomycin                  | 84             |
| nrps-like                             | 759075     | 798968   | Hygromycin B                  | 12             |
| t3pks-nrps-betalactone                | 820218     | 888280   | Lomaiviticin                  | 6              |
| indole-transatpks-nrps                | 940834     | 1004891  | Cinnabaramide                 | 18             |
| t3pks-nrps                            | 1056258    | 1144347  | Balhimycin                    | 43             |
| thiopeptide                           | 1210965    | 1240305  | Lavendiol                     | 6              |
| nrps                                  | 1305544    | 1348177  | -                             | -              |
| terpene                               | 1508180    | 1533212  | Hopene                        | 84             |
| nrps-like-hgIE-KS                     | 1697106    | 1763315  | -                             | -              |
| t1pks                                 | 2100640    | 2145201  | Calicheamicin                 | 5              |
| terpene                               | 2269014    | 2289681  | Geosmin                       | 100            |
| bacteriocin                           | 2323434    | 23346271 | -                             | -              |
| terpene                               | 2429713    | 2449228  | Pentalenolactone              | 52             |
| nrps                                  | 256766     | 2618409  | Coelichelin                   | 100            |
| siderophore                           | 2623445    | 2638428  | Ficellomycin                  | 3              |
| nrps                                  | 3133645    | 3187074  | Albaflavenone                 | 36             |
| terpene                               | 3252815    | 3270943  | Albaflavenone                 | 100            |
| t1pks-butyrolactone                   | 3421226    | 3464976  | Tetronasin                    | 9              |
| nrps-ladderane                        | 4115633    | 4182686  | Ishigamide                    | 100            |
| melanin                               | 4275008    | 4285445  | Istamycin                     | 5              |
| t1pks-nrps                            | 6098225    | 6147146  | GE81112                       | 7              |
| ectoine                               | 6585365    | 6595769  | Ectoine                       | 100            |
| nrps                                  | 7420986    | 7469702  | Mirubactin                    | 50             |
| t3pks                                 | 7597881    | 7636578  | BE-14106                      | 14             |
| terpene                               | 7702912    | 7727000  | Isorenieratene                | 100            |
| t1pks-nrps                            | 7800651    | 7858021  | GE81112                       | 10             |
| bacteriocin-indole-t1pks-terpene-nrps | 7861674    | 7974735  | A-503083                      | 7              |
| t1pks-nrps-like                       | 8020578    | 8065515  | Herboxidiene                  | 5              |
| other-CDPS                            | 8134917    | 8175747  | Lavendiol                     | 6              |
| t3pks                                 | 8221982    | 8263039  | Alkylresorcinol               | 100            |
| bacteriocin-nrps                      | 8306025    | 8392219  | Surugamide A / surugamide D   | 23             |
| nrps                                  | 8467004    | 8525260  | Vioprolide                    | 16             |
| butyrolactone                         | 8560299    | 8571255  | Griseoviridin / viridogrisein | 5              |
